# Supplementary material for: TRPV1 channels are critical brain inflammation detectors and neuropathic pain biomarkers in mice
Source: Springer Nature journal article supplement (doi:10.1038/ncomms15292), 2017-05-10
Supplement: 41467_2017_BFncomms15292_MOESM655_ESM.pdf [file 41467_2017_BFncomms15292_MOESM655_ESM.pdf]

1 **Supplementary Figures**

2

3 **Supplementary Figure 1: TRPV1 expression in the ACC of both naïve and CCI**  
4 **young mice.**

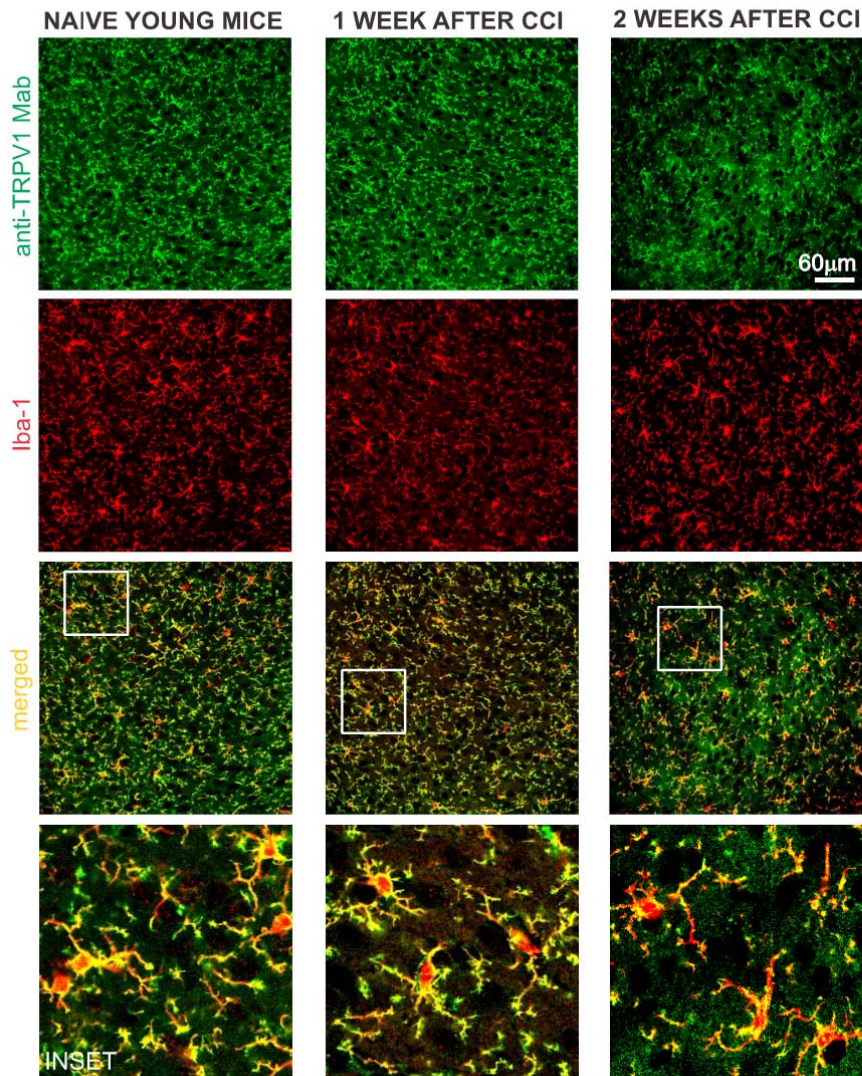

5

6 As in adult mice, the anti-TRPV1 MAb (green label) stains cortical microglial  
7 processes and somas (red label) of naïve young mice, as shown by the colocalization  
8 (in yellow) between the anti-TRPV1 and the iba-1.

9 Unlike CCI adult animals, TRPV1 is purely expressed in the microglia of the ACC of  
10 1-week CCI young mice (4 experiments from 4 mice, n=4/4). Considering the faster  
11 cellular reproduction in youngs, TRPV1 expression has been tested in the ACC  
12 sections from 2-weeks CCI young mice. Also at this time point, TRPV1 is selectively  
13 expressed in microglia cells (n=2/2). Same result is observed in the ACC of 3 days  
14 CCI young mice (data not shown).

15

16 **Supplementary Figure 2: TRPV1 antibody validation.**

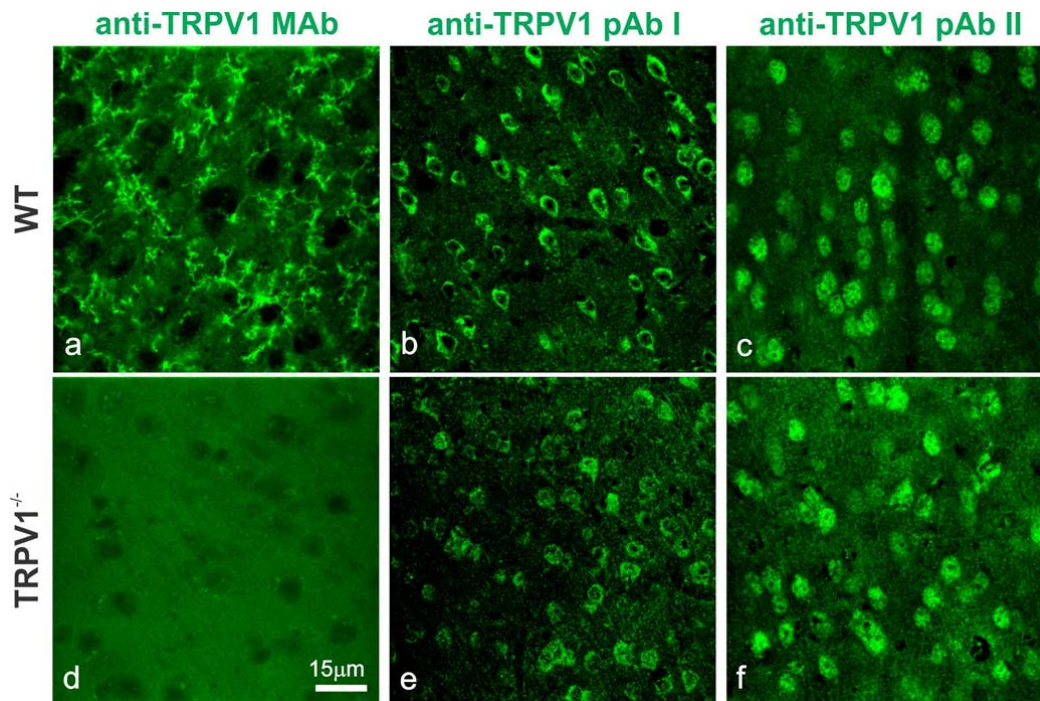

17  
18

19 High resolution confocal laser scanning photomicrographs of ACC sections **from the**  
20 **same wt (a-c) and the same TRPV1<sup>-/-</sup> mice (d-f)**, showing the staining pattern of  
21 three different anti-TRPV1 antibodies (Abs). **(a)** Anti-TRPV1 MAb labeling of fibers  
22 (Millipore Chemicon, 1:100). Same protocol of immunostaining on TRPV1<sup>-/-</sup> mice  
23 tissues **(d)** shows no stain from both primary or secondary antibody (the latter tested  
24 on the background controls of secondary Ab2s; data not shown). **(b,c)** The cell  
25 cytoplasm or whole-cell body labelling of two anti-TRPV1 pAbs is similar in cortical  
26 tissues from wt and -/- mice **(e, Immunological Sciences, 1:100; f. Neuromics, 1:500)**.  
27 Scale bar, 15 µm.  
28

29 **Supplementary Figure 3: Both Iba-1 and TRPV1 signals were higher in young**  
30 **than adult mice.**

31

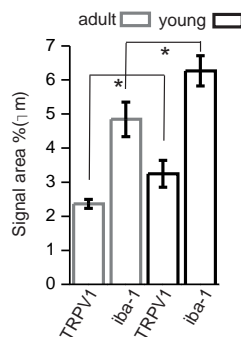

32  
33  
34

Quantification of the area filled by the TRPV1 signal and Iba-1 one. In cortical sections from naïve young mice both TRPV1 (n=12/8) and Iba-1 (7/6) signal areas are

35 significantly larger compare adult animals (n=16/9 for TRPV1, n=6/6 for Iba-1;  
 36 \*p<0.05).  
 37

38 **Supplementary Figure 4: Expression of TRPV1 mRNA and protein in microglial**  
 39 **cells, neurons and mouse tissue**

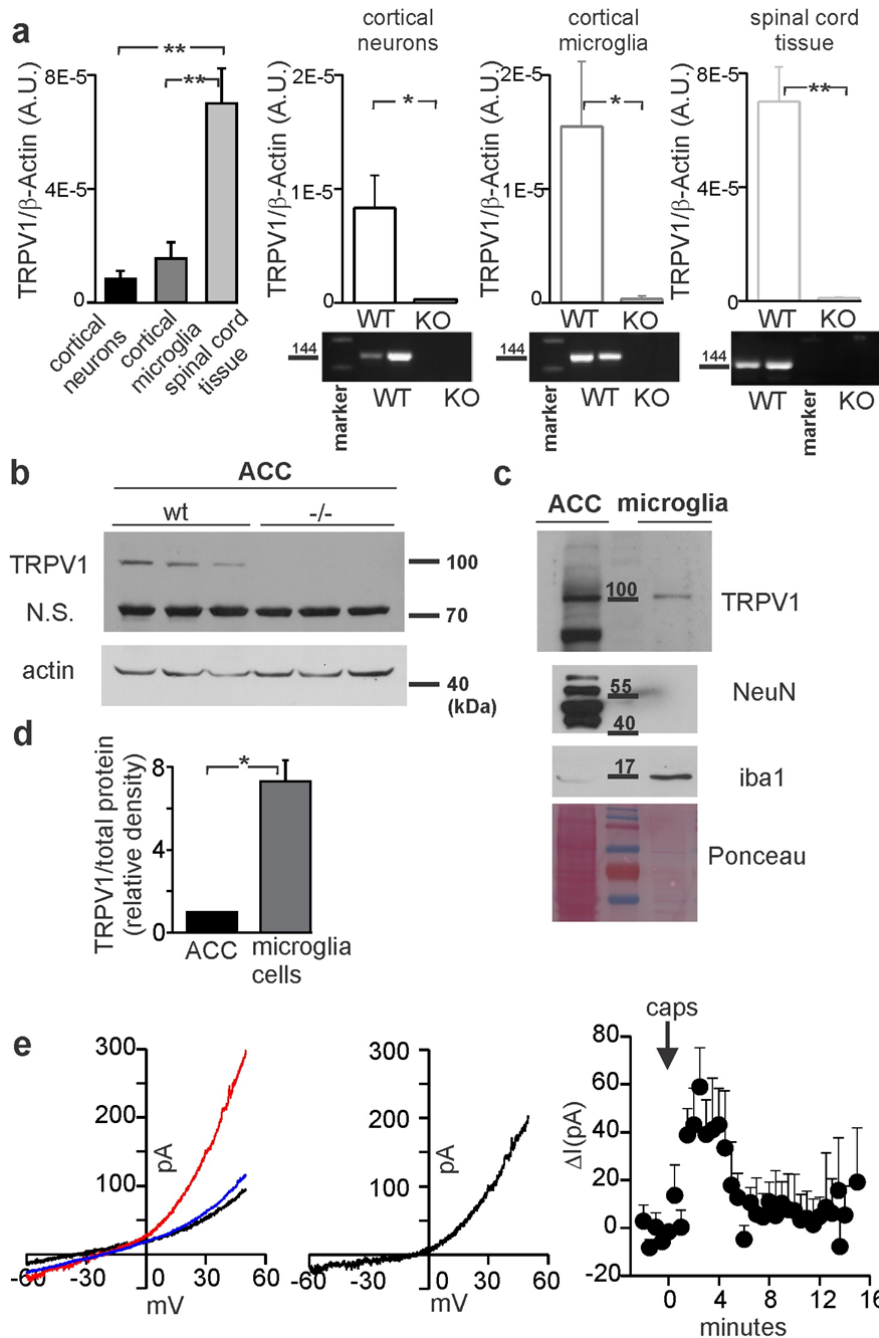

40

41 (a) RT-PCR of TRPV1 gene expression in cortical neurons, microglial cells and  
 42 spinal cord isolated from C57BL6J or *TRPV1*<sup>-/-</sup> mice: for each sample, TRPV1  
 43 threshold cycle was normalized to that of  $\beta$ -actin. Data are expressed as mean $\pm$ SD and  
 44 are representative of four independent pools of mouse cortices (3-4 mice/pool)  
 45 (\*\*p<0.01 one-way ANOVA for left panel and \*p<0.05 and \*\*p<0.001 Student t-test

46 for the remnant panels). A representative agarose gel (2%) electrophoresis of two  
47 samples per cell type/tissue is also shown in order to display the specificity of RT-  
48 PCR reactions. **(b)** Representative immunoblot of TRPV1 expression in ACC from  
49 wild-type (wt) and *TRPV1*<sup>-/-</sup> mice. Protein lysate of each tissue was subjected to  
50 immunoblotting following SDS-10% PAGE against the anti-TRPV1 monoclonal  
51 antibody. The bottom portion of the nitrocellulose membranes was probed with the  
52 anti-actin antibody, as loading control. N.S.: non specific band. Note that this band is  
53 still present in tissue from *TRPV1*<sup>-/-</sup> mice. **(c)** Representative immunoblots comparing  
54 the TRPV1 content in ACC (50 µg) and microglial cells (6 µg). Microglial cells  
55 isolated from mice were lysed and subjected to immunoblotting against the anti-  
56 TRPV1 antibody. Note that N.S. band is absent in microglia cell cultures. Due to a  
57 strong difference in relative abundance of actin in the protein extracts of ACC tissues  
58 and isolated microglial cells (data not shown), the enrichment in TRPV1 expression  
59 was assessed by normalizing optical density values for the Ponceau staining of total  
60 proteins<sup>74</sup>. Particularly, optical density values were internally normalized by Ponceau  
61 staining of total protein content and further corrected for the value of ACC considered  
62 equal to 1. \*p<0.05 vs ACC. The purity of microglial cultures was assessed by  
63 assessing specific markers for neurons (NeuN) and microglia cells (Iba1). **(d)** Bar  
64 graph of summary data of normalized densitometric ratios ± S.D. of three separate  
65 experiments. **(e)** *Left*, Current-voltage relationship of the capsaicin-induced current by  
66 application of capsaicin 1µM in a microglial cell from acute cortical slice of  
67 *CX3CRI*<sup>+/*GFP*</sup> mouse before (black curve), during (red curve) and after (blue curve)  
68 capsaicin application; *Middle*, capsaicin induces an outward rectifying current with  
69 reversal potential at about 0 mV (results obtained by subtracting the current before  
70 and after the capsaicin application). *Right*, time plot of the mean current amplitude at  
71 +50 mV (n=9). The arrow indicate 3-9 minutes of capsaicin application.

72

73

74

75

76

77

78

79

80

81

82

83

84

85

86 **Supplementary Figure 5: TRPV1 distribution in astrocytes of the ACC and**  
 87 **hippocampus of adult naïve mice.**

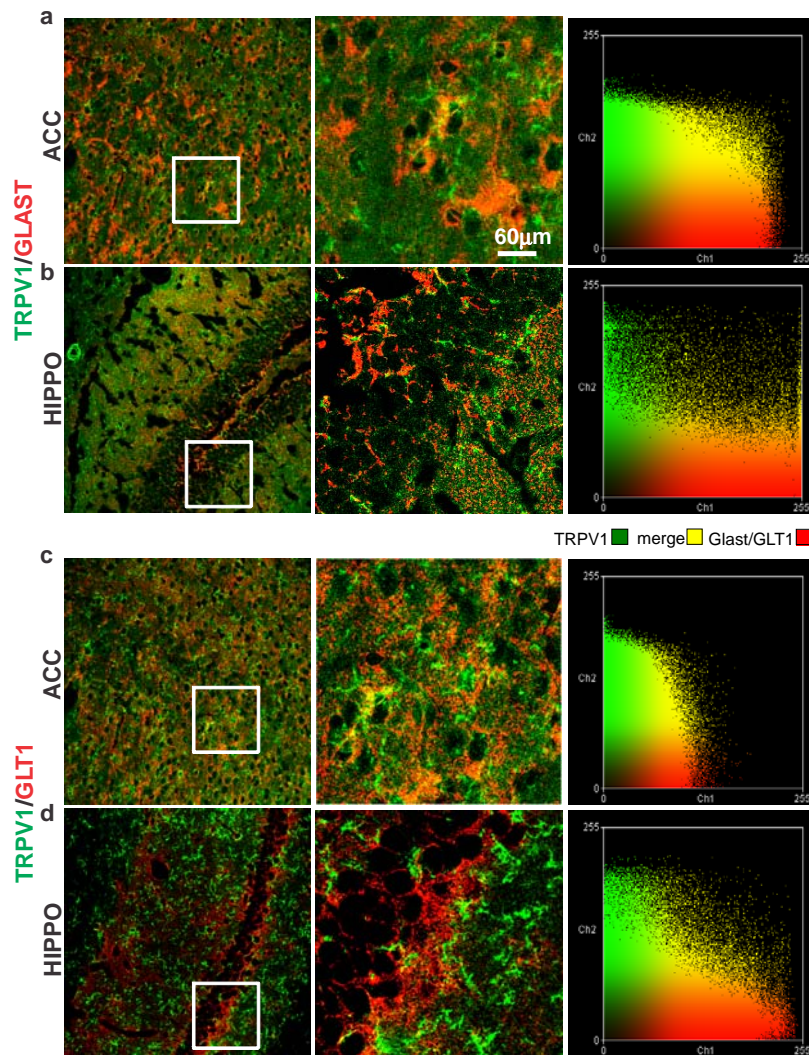

88  
 89  
 90 (a,d) Representative photographs of anti-TRPV1 and anti-GLAST (a,b) or anti-GLT1  
 91 (c,d) positive astrocytes of ACC (a,c) and hippocampus (HIPPO; b,d). Merging areas  
 92 magnifications are presented in the middle panels. Scale bar, 60µm. In the right  
 93 panels, correlative color scatter plots of TRPV1 (green) and GLAST/ GLT1 (red) for  
 94 the single experiment reported in a,b,c,and d, show the colocalization (yellow) of the  
 95 two antibodies (in a,  $r = 0.046$ ; in b,  $r = 0.17$ ; in c,  $r = 0.043$ ; in d  $r = 0.194$ ).

96  
 97

98

99

100

101

102 **Supplementary Figure 6: TRPV1 is distributed in the microglia of other brain**  
103 **areas.**

104

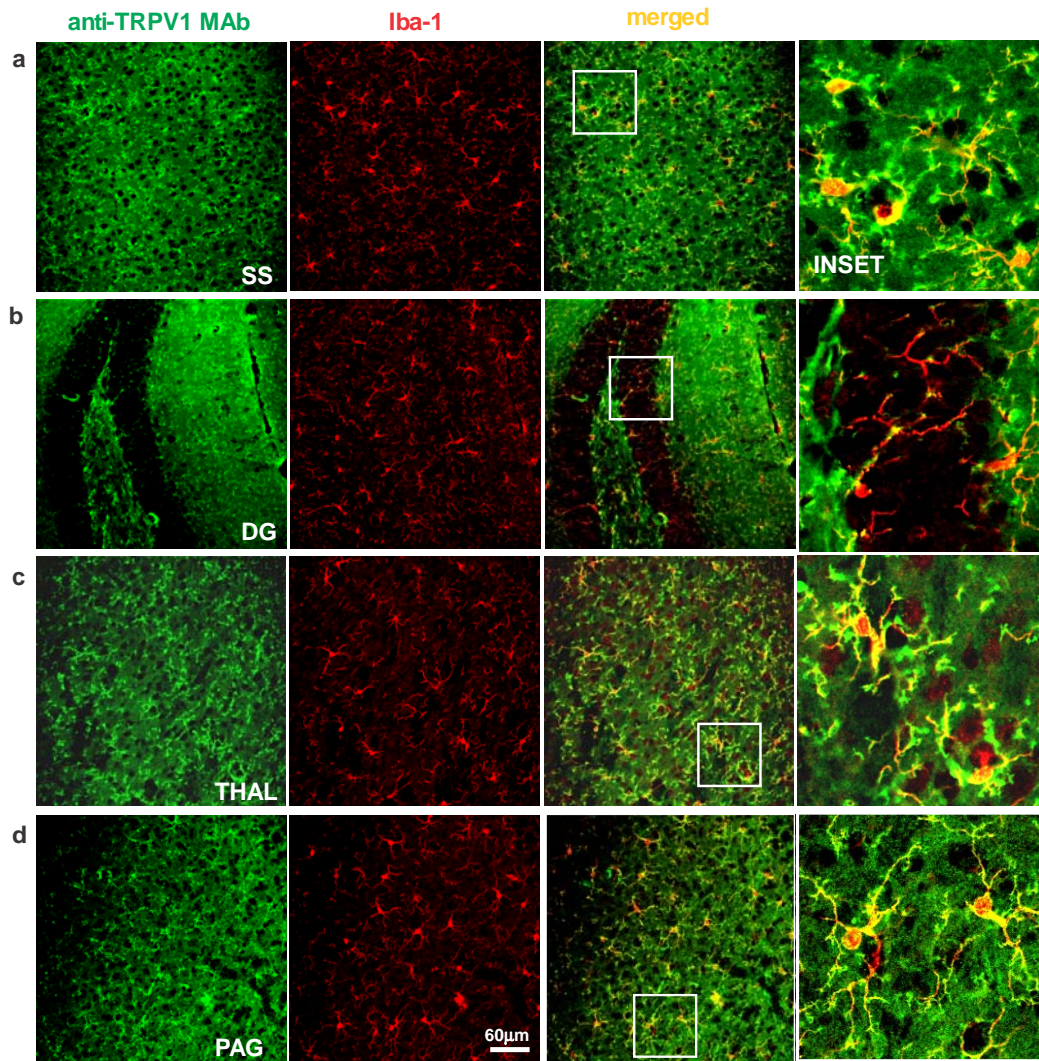

105  
106

107 **(a-d)** Confocal laser scanning photomicrographs of somatosensory cortex (SS n=17/9),  
108 dentate gyrus (DG n=17/9), thalamus (THAL n=17/9) and periaqueductal gray (PAG  
109 n=11/6) showing labeling for anti-TRPV1, Iba-1 and their merged. Like the ACC,  
110 also in these brain regions the TRPV1 is mainly expressed in the microglia. Scale bar,  
111 60µm for the lower magnification images.

112

113

114

115

116

117

118 **Supplementary Figure 7: In the dorsal horn of naïve mice TRPV1 is also**  
119 **expressed in neurons.**

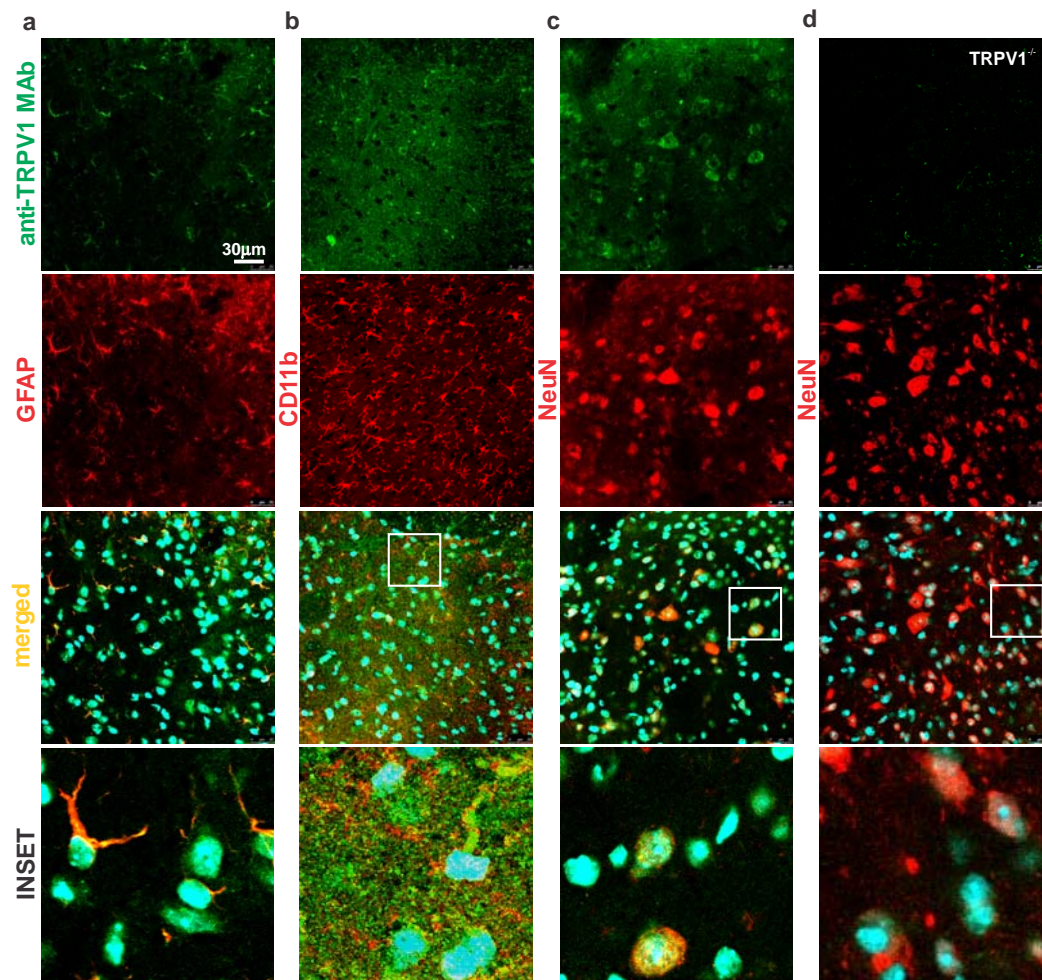

120  
121  
122 Representative confocal images of spinal cord dorsal horn sections immunolabeled  
123 with the TRPV1 Mab (green), anti- GFAP, CD11b, and NeuN (all red) from WT  
124 (a,b,c) and *TRPV1*<sup>-/-</sup> mice (d). Differently from brain areas, TRPV1 is also present in  
125 neurons of spinal cord naïve mice (n=4/4). Scale bar, 30µm for the lower  
126 magnification images.  
127  
128

129  
130  
131  
132  
133  
134

135 **Supplementary Figure 8: TRPV1 is expressed in both glutamatergic and**  
 136 **GABAergic neurons of the dorsal and ventral horn**

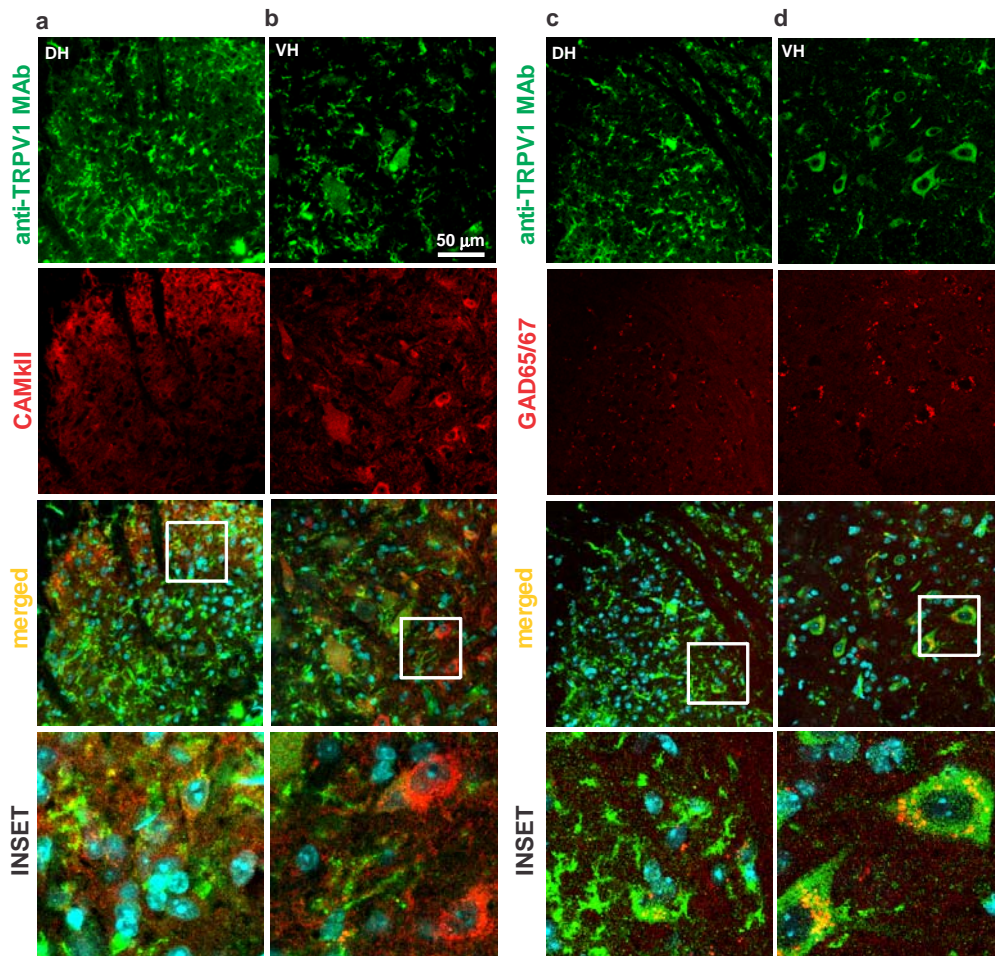

137  
 138 **(a,b)**Photomicrographs of immunofluorescence for the anti-TRPV1 MAb (green) and  
 139 anti-CAMKII (red) in dorsal (DH) and ventral horn (VH). CAMKII is highly and  
 140 diffusely expressed in DH and less in VH of naïve animal spinal cord. The anti-  
 141 TRPV1 MAb is highly expressed and partially co-localizes with CAMKII present in  
 142 body cells of both horns (merged panels-yellow). **(b,c)** Photomicrographs of double  
 143 immunofluorescence for anti-GAD65/67 (red) and anti-TRPV1 MAb (green). The  
 144 GAD65/67 is stained as dot-like pattern in DH and VH of naïve animal spinal cord.  
 145 The anti-TRPV1 MAb is highly expressed and partially co-localizes with the anti-  
 146 GAD65/67 present in body cells (merged panels - yellow).

147 Note that the TRPV1 expression on VH neurons may provide a preliminary evidence  
 148 on a possible involvement of TRPV1 signaling in the nocifensive behavior.

149  
 150  
 151  
 152



153 **Supplementary Figure 9: anti-TRPV1 MAb staining pattern in adult WT and**  
154 ***TRPV1*<sup>-/-</sup> DRG neurons**

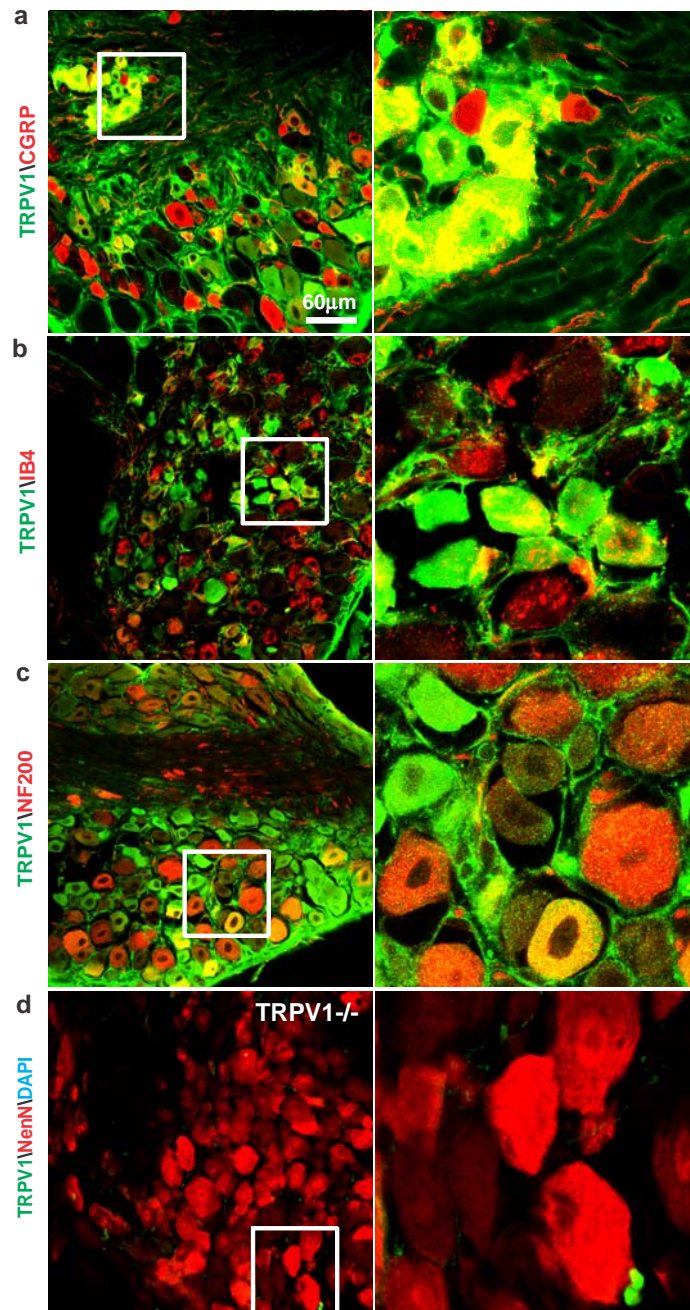

155  
156 40x confocal images (left panels) and detail magnification (right panels) of DRG  
157 sections. Double staining of anti-TRPV1 MAb (green) with anti-CGRP (a), anti-IB4  
158 (b) anti-NF200 (c, all in red) in DRG neurons of WT animals (n=4) indicates that part  
159 of neurons identified into each subgroup expressed TRPV1 (yellow; 32% of CGRP<sup>+</sup>  
160 neurons are TRPV1<sup>+</sup>, 14.5 % of IB4<sup>+</sup> neurons are TRPV1<sup>+</sup>, 14 % NF100<sup>+</sup> cells were  
161 TRPV1<sup>+</sup>). (d) In *TRPV1*<sup>-/-</sup> DRG no cells show labelling for TRPV1 MAb (n=3). Scale  
162 bar, 60μm for the lower magnification images.  
163 Note that the NF200<sup>+</sup> neurons might correspond to the heat-sensitive myelinated  
164 nociceptors<sup>90</sup>.

165  
166

**Supplementary Figure 10: TRPV1 distribution pattern in 3 days CCI adult mice.**

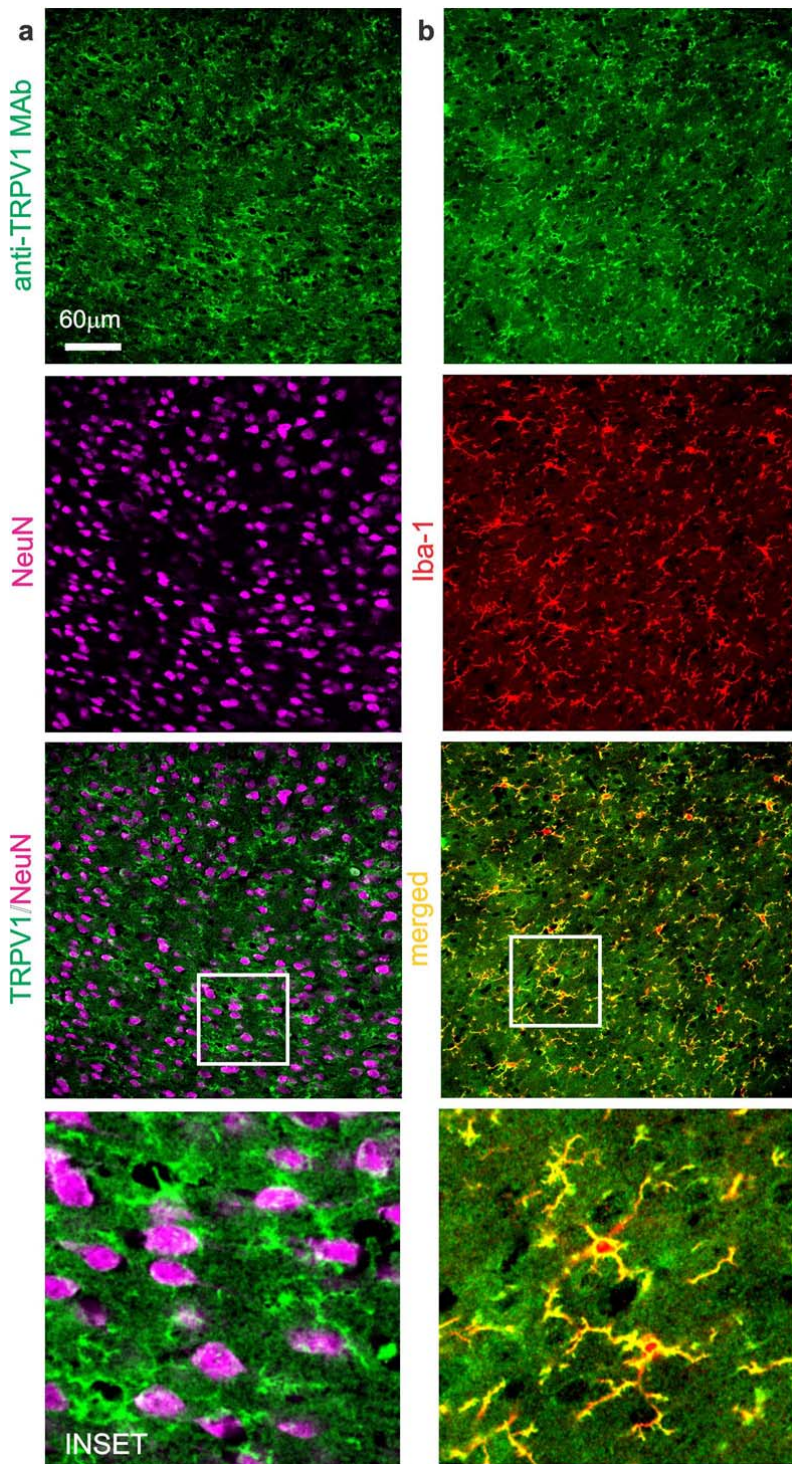

167

168 Double immunostaining for (a) TRPV1 (in green) and neurons (purple label), and for  
169 (b) TRPV1 and microglial cells (in red) from ACC sections of 3 days CCI mice. Anti-  
170 TRPV1 positive fibers surround neuronal bodies and are fully labeled with the iba-  
171 1(merging points in yellow). The TRPV1 expression pattern in the cortex of 3 days  
172 CCI mice were similar to naïve mice (see Fig 1). Scale bar, 60µm for the lower  
173 magnification images.

174 **Supplementary Figure 11: Anti-TRPV1 neuronal labeling was absent in CCI**  
175 **TRPV1<sup>-/-</sup> mice.**

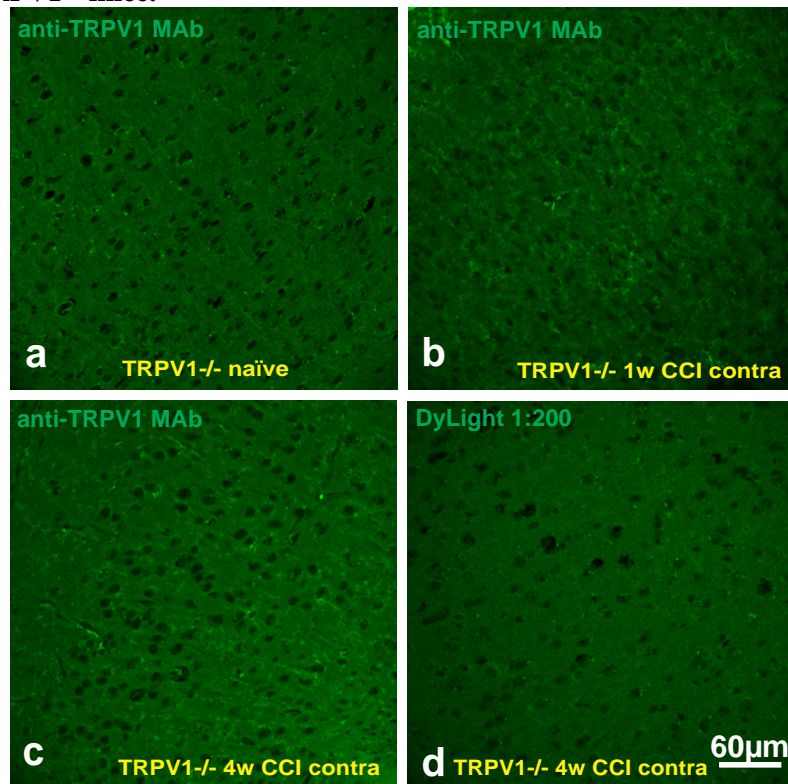

176 Confocal laser scanning photomicrographs of ACC sections containing superficial  
177 layers from naïve (a), 1 week (b) and 1 month CCI TRPV1<sup>-/-</sup> mice (c,d) stained with  
178 the anti-TRPV1 MAb (Millipore Chemicon, 1:100) (a-c) or background control of  
179 secondary Ab (d). Anti-TRPV1 MAb shows no staining in naïve condition (a, n=4)  
180 and neither at 1 week (b, n=3) nor at 4 weeks (c, n=6) after CCI. Background control  
181 of secondary Ab shows no false staining (d).  
182  
183

184  
185  
186  
187  
188  
189  
190  
191  
192  
193  
194  
195  
196

197 **Supplementary Figure 12: Capsaicin-induced increase of mEPSC is due to**  
 198 **AMPA receptors activation**

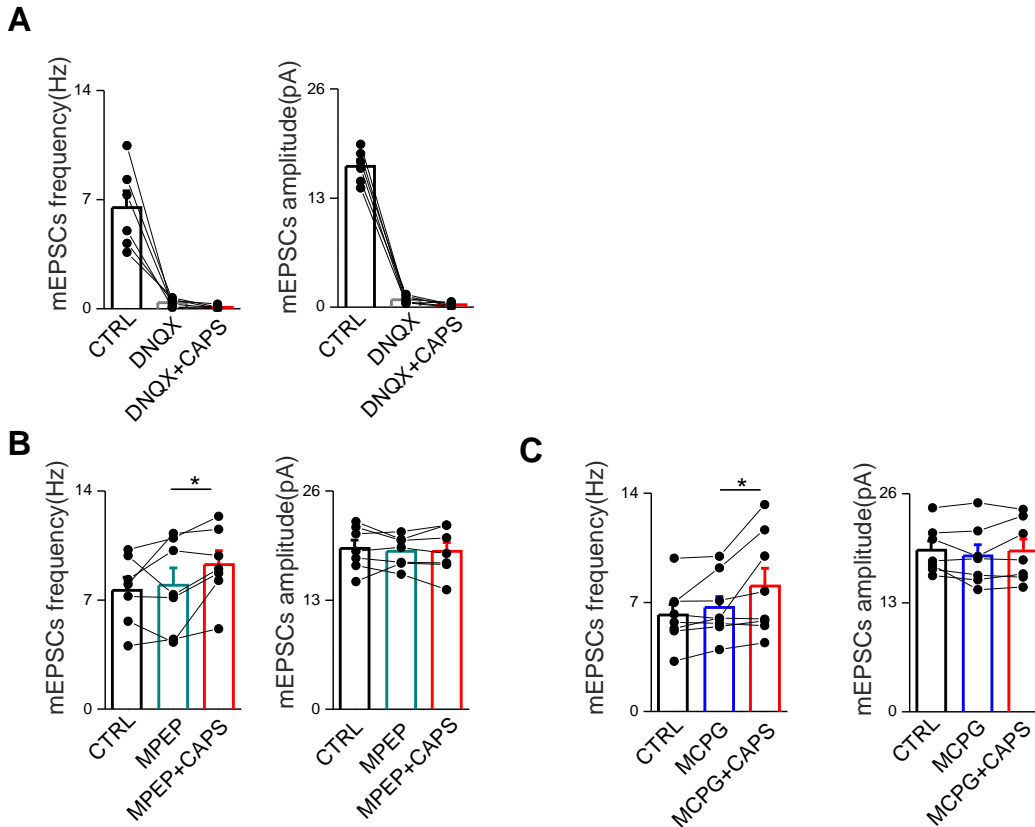

199  
 200 (a) The non-NMDA receptors antagonist, 6,7-dinitroquinoxaline-2,3-dione (DNQX,  
 201 20  $\mu\text{M}$ ) completely abolished both frequency and amplitude of mEPSCs ( $n=6$ , paired  
 202 T-test  $p= <0.001$ );. In these conditions, capsaicin increased neither frequency nor  
 203 amplitude of mEPSCs, suggesting that downstream TRPV1 signalling is AMPA  
 204 receptor mediated. The NMDA component was excluded in this type of experiments  
 205 (resting membrane potential  $-70\text{mV}$ ,  $[\text{Mg}^{2+}]$   $2\text{mM}$  in the internal solution). (b,c) Glia-  
 206 derived glutamate facilitates neurotransmitters release through presynaptic  
 207 metabotropic receptors (Fiacco and McCarthy, 2004;Perea and Araque, 2007; Pascual  
 208 et al. 2012); to investigate a possible involvement of these receptors in the presynaptic  
 209 modulation of glutamatergic transmission upon TRPV1 activation, capsaicin was  
 210 applied with the mGluR5 antagonist MPEP ( $50\mu\text{M}$ ) or with the non-selective group I  
 211 mGluR antagonist MCPG ( $100\mu\text{M}$ ). In both assays capsaicin significantly increased  
 212 mEPSC frequency ( $n=7$ ,  $p=0.040$  paired sample T-test and  $n=8$ ,  $p=0.042$  paired  
 213 sample T-test, respectively), suggesting that mGluR are not involved in the upstream  
 214 TRPV1 signalling. Both MPEP and MCPG did not induce changes in basal synaptic  
 215 properties. (Ctrl  $7.62203 \pm 0.83$  Hz, MPEP  $7.95877 \pm 1.10$  Hz; Ctrl  $19.16708 \pm$   
 216  $0.98$  pA MPEP  $18.83072 \pm 0.69$  pA,  $n=7$ ,  $p=0.61$  and  $p=0.62$  respectively, paired  
 217 sample T-test; Ctrl  $6.19 \pm 0.67606$  MCPG  $6.66 \pm 0.71$ Hz; Ctrl  $19.46 \pm 0.97$   
 218 MCPG  $18.66 \pm 1.18$ ,  $n=8$ ,  $p=0.10$  and  $p=0.13$ , paired sample T-test).

219  
 220  
 221

222 **Supplementary Figure 13: Effects of ARN14988 and SB203580 on MV release**  
 223 **and neurotransmission**

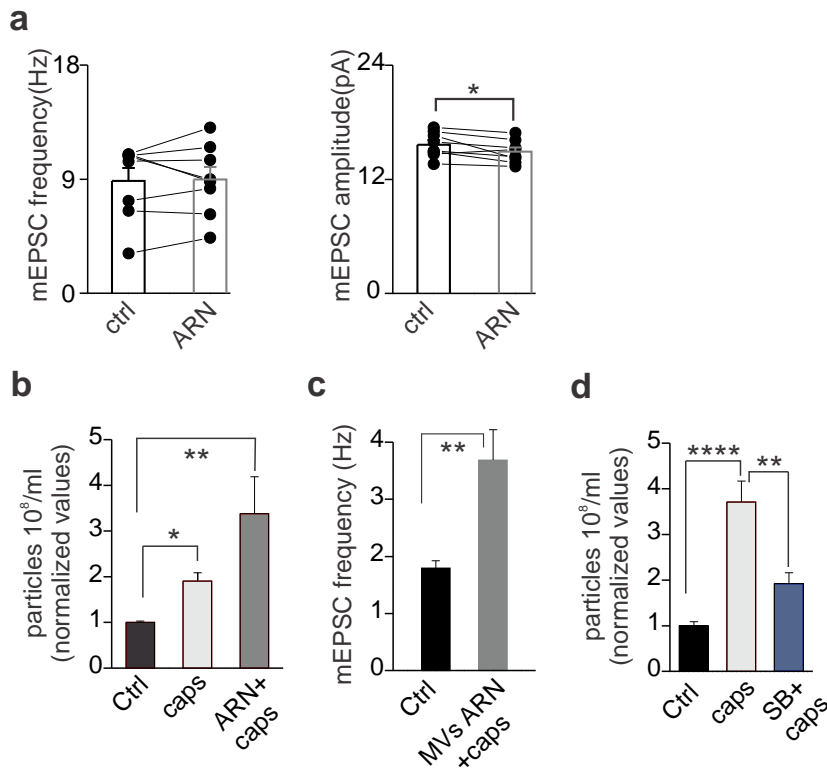

224  
225

226 **(a)** Summary graph of mEPSC frequency (left) and amplitude (right) before (black  
 227 empty bar) and after 3  $\mu$ M ARN 14988 (gray empty bar) ( $n=10$ ,  $p=0.84$  and  $*p<0.05$ ,  
 228 Paired Sample t-test). **(b)** Microglia cell cultures were challenged with vehicle, caps  
 229 or ARN+caps and MVs shedding were measured. Histogram shows the fold increase  
 230 of total EV concentration detected by Nanosight upon stimulation of microglia  
 231 cultures with vehicle (ctrl, black bar), capsaicin (light gray bar) or ARN+capsaicin  
 232 (dark grey bar; One way Anova  $*p<0.05$ ,  $**p<0.01$  Dunn's Method for multiple  
 233 comparison test). **(c)** Changes of mEPSCs evoked by MVs previously treated with  
 234 ARN+caps (ctrl  $n=10$ , caps  $n=8$ ,  $p<0.01$  Mann-Whitney Rank Sum Test). **(d)** As in  
 235 (b) but with 400nM SB203580 (blue bar; One way Anova  $****p<0.0001$  followed by  
 236 Tukey's multiple comparison test)

237  
238  
239  
240  
241  
242  
243

244 **Supplementary Figure 14: Microglia morphology characterization**

245

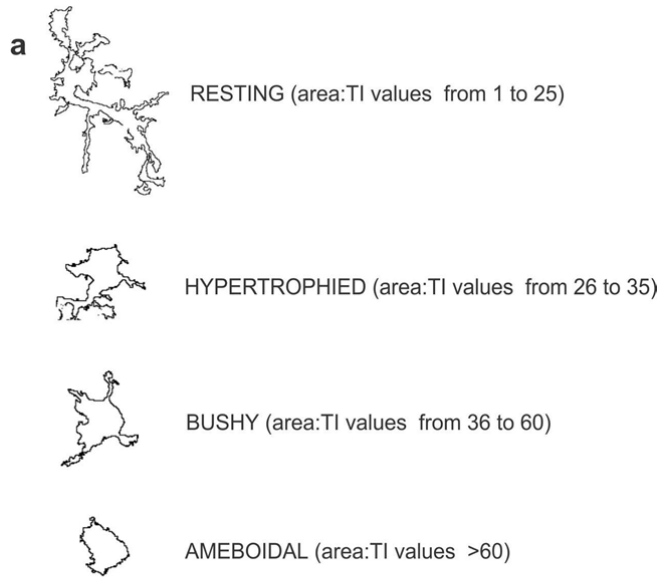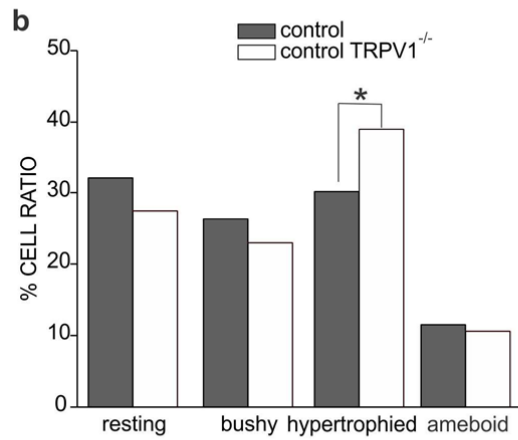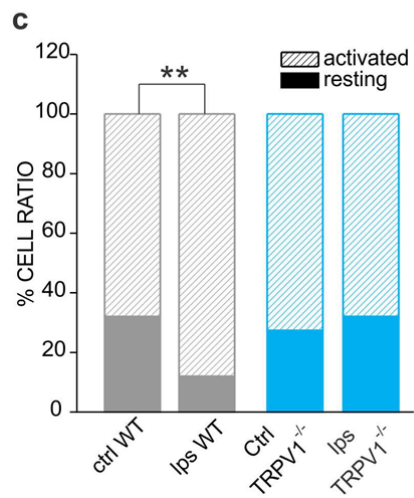

246

247 (a) Example of binary (digital) silhouettes of microglia cells from cortical slices  
248 acquired by transforming the tiff files of Iba1-immunoreactive cells to binary files by  
249 means of the ImageJ software. The cell area values and the TI were calculated for  
250 each silhouette and the obtained area/TI ratio value was used to classify each cell in a  
251 specific category (resting, hypertrophied, bushy and amoeboid). (b) Plot of stochastic  
252 sampling of microglia cells belong to a specific category from WT (black bars) and  
253 *TRPVI*<sup>-/-</sup> (empty bar) cortical slices (n=5 for both WT and *TRPVI*<sup>-/-</sup>). Note that in no  
254 treated-*TRPVI*<sup>-/-</sup> tissue there is a higher amount of hypertrophied microglia cells than  
255 in WT. (c) Stack column graph showing a greater percentage of activated cells  
256 (striped bar) related to resting microglia (filled bar) in WT slices (grey bars) treated  
257 for 10 minutes with LPS (500ng/ml). The same treatment carried out on slices from  
258 *TRPVI*<sup>-/-</sup> mice (blue bars) produced no changes in the number of activated cells.  
259 (\*p<0.05, \*\*p<0.01 Fisher's exact test).

260

261

262

263

264

265

266

267

268

269

270

271

272

273

274

275

276

277

278

279

280

281 **Supplementary Figure 15: Electrophysiological features of CCI PNs in baseline**  
 282 **conditions and after TRPV1 activation**

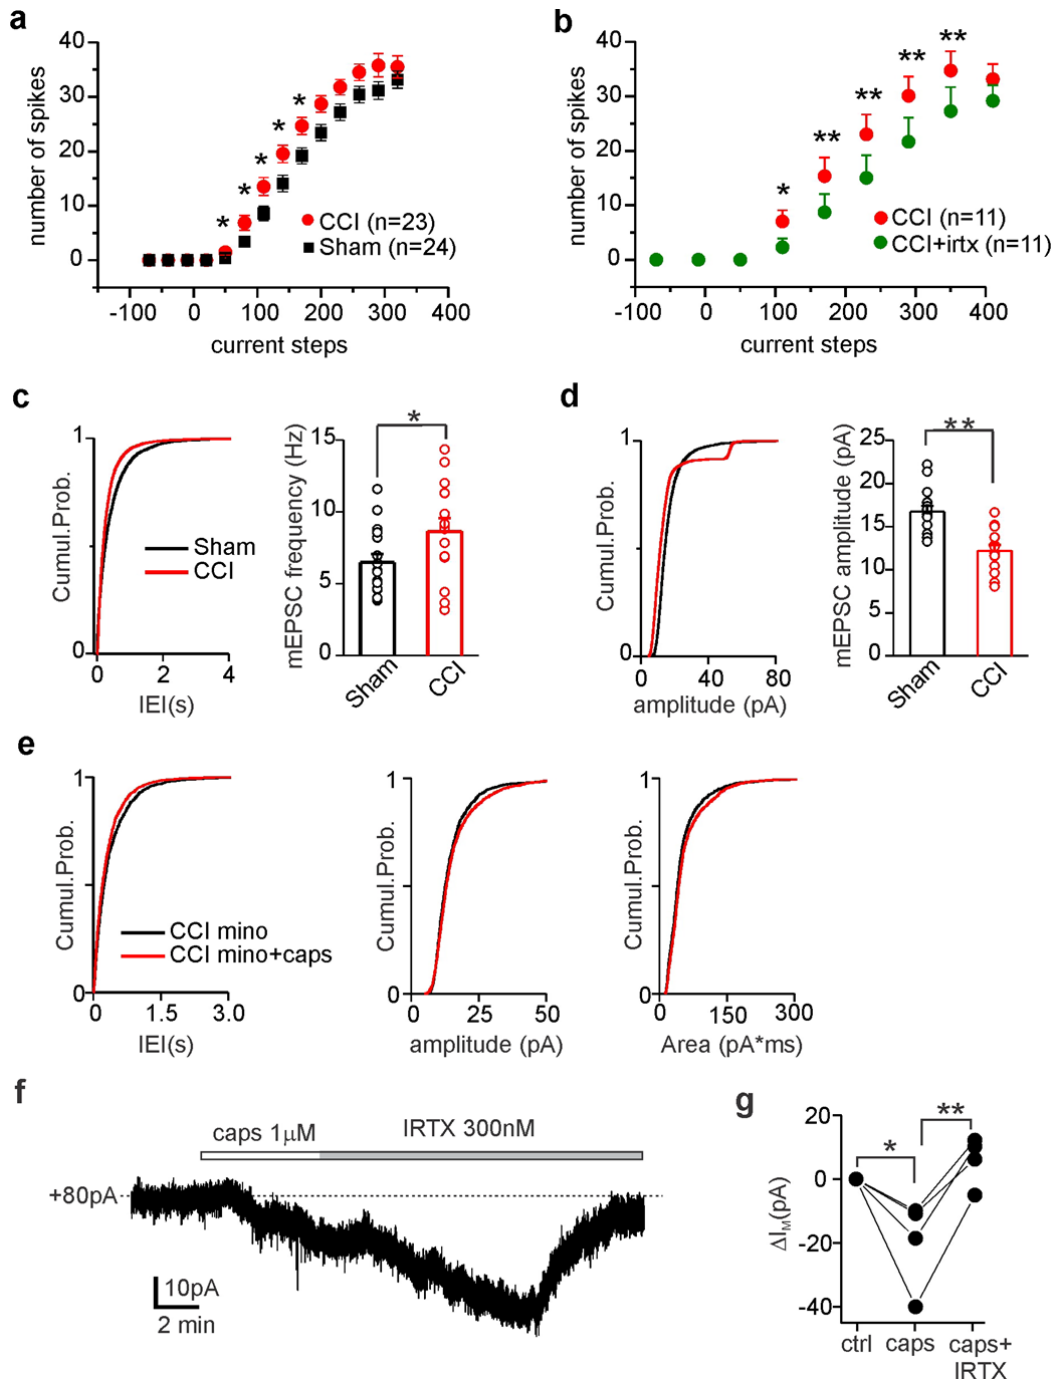

283  
284

285 (a) Comparison between average input-out (input current/number of spikes) curves  
 286 for the two conditions, shams (black dots) and CCI (red dots). The sciatic nerve  
 287 ligation caused a leftward shift of the input current to action potential curves, with a  
 288 significant increase of firing rate over a range of current injections.  $P < 0.05$  Mann-  
 289 Whitney test. (b) Average input current/number of spike curves for control (red) and  
 290 after IRTX (green) from CCI PN recordings. The inhibition of TRPV1s significantly  
 291 reverted the leftward shift of the input-output curve induced by the surgery of the



292 sciatic nerve (\*p<0.05, \*\*p<0.005, Paired Sample Wilcoxon Signed Rank test). (c)  
 293 On the left, cumulative probability curves of mEPSC interevent intervals for the total  
 294 recorded neurons from sham (n=16, black line) and CCI mice (n=14, red line)  
 295 (p<0.001 Kolmogorov-Smirnov test). Right, summary histograms and line series plots  
 296 of mEPSC from PNs of shams and CCI mice (6.47±0.58 and 8.63±0.92 Hz shams  
 297 [n=16] and CCI mice [n=14], respectively p<0.05 Two sample T-test). (d) Left,  
 298 cumulative probability distributions of mEPSC amplitudes of total recorded PNs from  
 299 shams (in black) and CCI (in red), p<0.001 KS test. Right, summary histograms and  
 300 line series plots of mEPSC amplitudes from PNs of sham and CCI mice (16.76±0.65  
 301 and 12.2±0.67 pA, respectively, p<0.01 Two sample T-test). (e) Cumulative  
 302 probability distributions of interevent intervals (left) amplitude (center) and area (left)  
 303 of mEPSCs recorded from 4 cells of CCI mice in the presence of minocycline (p<0.01,  
 304 KS test). (f) Voltage-clamp recording of layer 2/3 PN from a 4 week CCI mice in the  
 305 presence of picrotoxin, APV, TTX, and DNQX. Application of capsaicin induced an  
 306 inward current that was reverted by IRTX. (g) Summary plot of changes in I<sub>M</sub> after  
 307 application of capsaicin and subsequent application of IRTX (n=4, \*p<0.05  
 308 \*\*p<0.01).  
 309  
 310

311

312

313 **Supplementary Figure 16: Development of allodynia after CCI.**

314

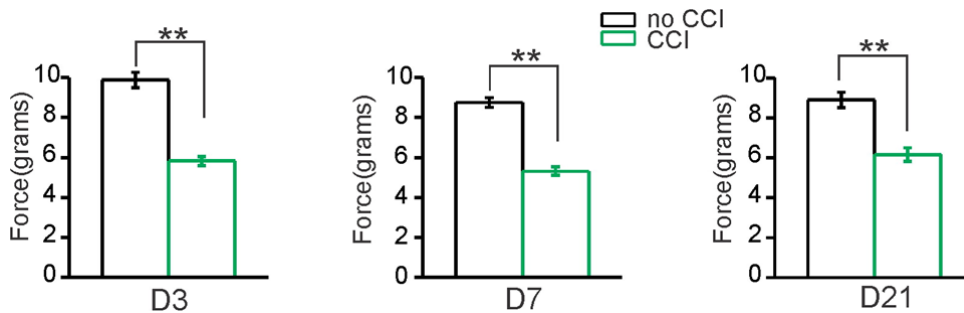

315

316 Mechanical threshold (force-grams) was measured in naive (no CCI, n=10) and CCI  
 317 mice (n=11) at 3 (D3; DF<sub>1,19</sub>; F 83,02; p<0.0001), 7 (D7; DF<sub>1,19</sub>; F 118,19; p<0.0001)  
 318 and 21 days (D21; DF<sub>1,19</sub>; F 28,05; p< 0.0001) after neuropathy induction.

319

320

321

322

323

324

325

326 **Supplementary Figure 17: Schematic summary of the proposed TRPV1**  
 327 **mechanism in the cortex of mice in physiological and neuropathic pain condition.**

328

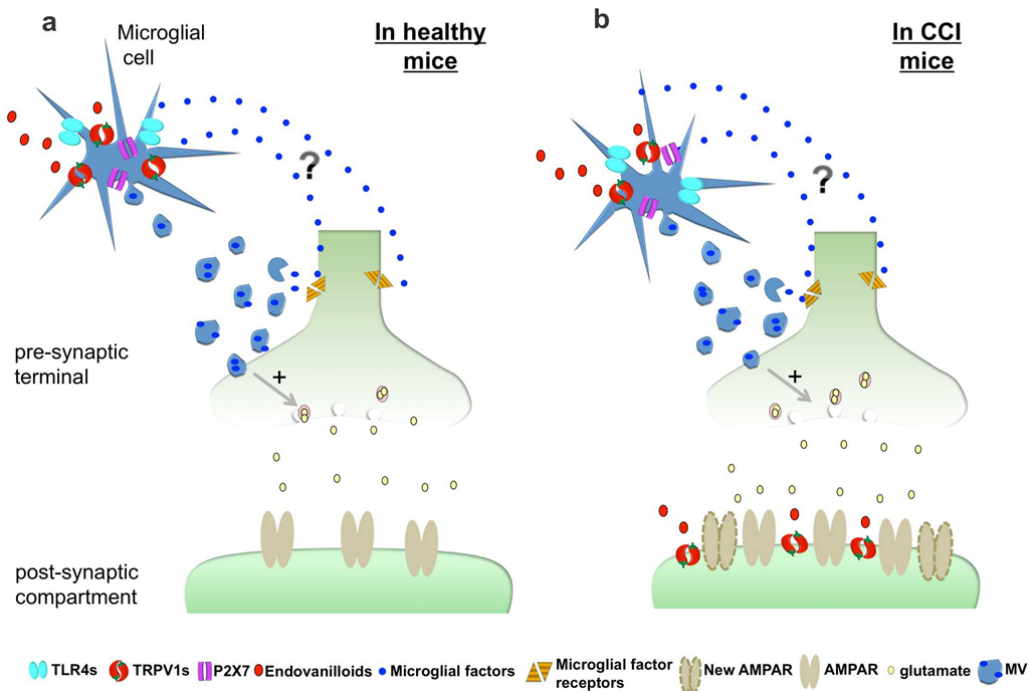

329

330 (a) In the cortex of healthy mice, TRPV1s are preferentially expressed in microglia.  
 331 Activation of these channels induces the microvesicles (MVs) shed from microglia  
 332 surface. Once released, these MVs may enhance spontaneous excitatory  
 333 neurotransmission by increasing the ready releasable pool of vesicles together with  
 334 the release probability. Additional players in the microglia to neuron communication  
 335 could be microglial factors released either from the breakdown of MVs or directly  
 336 from the microglia surface (such as IL-1 $\beta$ , NGF, ATP, NO, TNF $\alpha$  and glutamate). (b)  
 337 In mice suffering from neuropathic pain, TRPV1 are also localized in principal  
 338 cortical neurons, besides microglial cells. In this scenario, while microglial TRPV1  
 339 activation accounts for the increase of glutamate release, activation of postsynaptic  
 340 TRPV1 directly affects pyramidal neuron excitability by changing membrane  
 341 potential and likely increasing AMPA receptor trafficking.

342

343

344

345

346

347

348

349 **Supplementary Figure 18.**

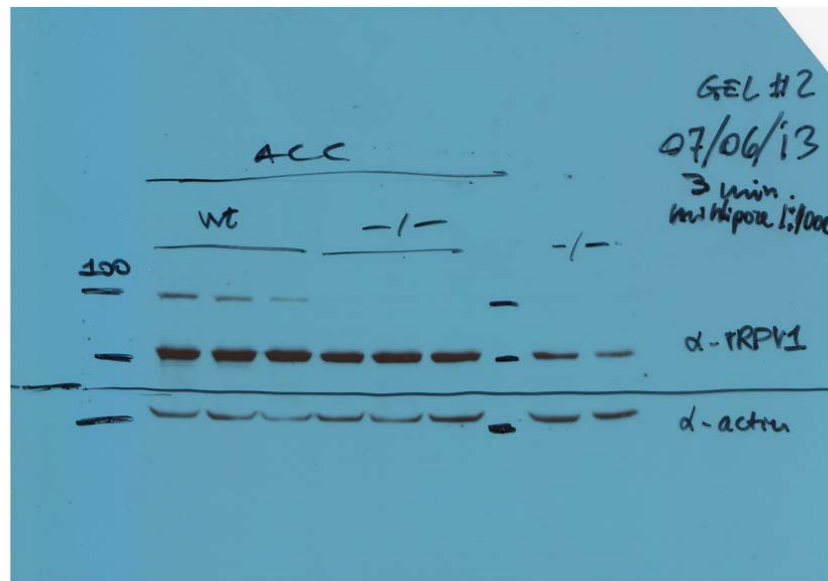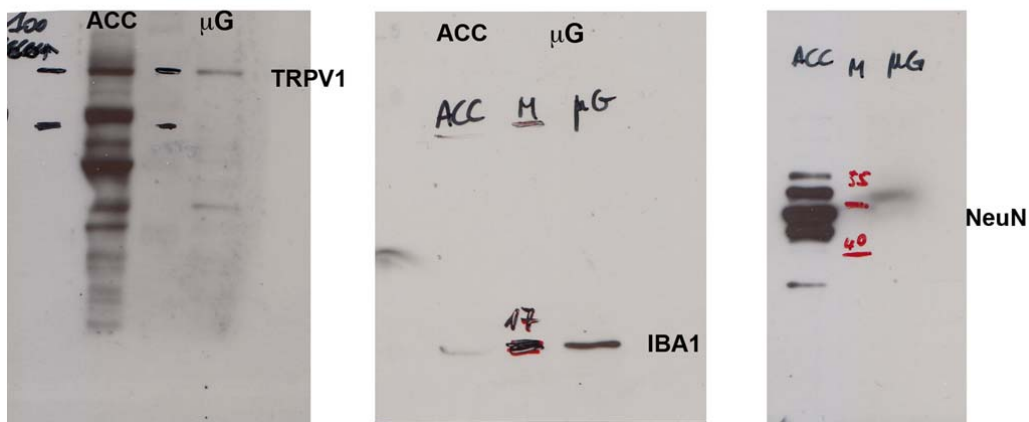

350  
351 Full western blots from which the cropped images in Supplementary Figure 4.

352

353 **SUPPLEMENTARY REFERENCES**

354

355 1. Li, Y., Du, X. F., Liu, C. S., Wen, Z. L. & Du, J. L. Reciprocal regulation between  
356 resting microglial dynamics and neuronal activity in vivo. *Dev Cell* **23**, 1189-1202  
357 (2012).

358 2. Ji, K., Akgul, G., Wollmuth, L. P. & Tsirka, S. E. Microglia actively regulate the  
359 number of functional synapses. *PLoS One* **8**, e56293 (2013).

360 3. Zhou, Q. et al. Decreased miR-199 augments visceral pain in patients with IBS  
361 through translational upregulation of TRPV1. *Gut* **65**, 797-805 (2016).

- 362 4. Jiang, G. et al. Expression levels of microRNA-199 and hypoxia-inducible factor-1  
363 alpha in brain tissue of patients with intractable epilepsy. *Int J Neurosci* **126**, 326-334  
364 (2016).
- 365 5. Luo, H., Cheng, J., Han, J. S. & Wan, Y. Change of vanilloid receptor 1 expression  
366 in dorsal root ganglion and spinal dorsal horn during inflammatory nociception  
367 induced by complete Freund's adjuvant in rats. *Neuroreport* **15**, 655-658 (2004).
- 368 6. McKelvey, R., Berta, T., Old, E., Ji, R. R. & Fitzgerald, M. Neuropathic pain is  
369 constitutively suppressed in early life by anti-inflammatory neuroimmune regulation.  
370 *J Neurosci* **35**, 457-466 (2015).
- 371 7. Latremoliere, A. & Woolf, C. J. Central sensitization: a generator of pain  
372 hypersensitivity by central neural plasticity. *J Pain* **10**, 895-926 (2009).
- 373 8. Barrientos, R. M. et al. Peripheral infection and aging interact to impair  
374 hippocampal memory consolidation. *Neurobiol Aging* **27**, 723-732 (2006).
- 375 9. Konsman, J. P., Parnet, P. & Dantzer, R. Cytokine-induced sickness behaviour:  
376 mechanisms and implications. *Trends Neurosci* **25**, 154-159 (2002).
- 377 10. Chen, T. et al. Postsynaptic potentiation of corticospinal projecting neurons in the  
378 anterior cingulate cortex after nerve injury. *Mol Pain* **10**, 33 (2014).
- 379 11. Zhuo, M. Cortical excitation and chronic pain. *Trends Neurosci* **31**, 199-207  
380 (2008).
- 381 12. Bushnell, M. C., Ceko, M. & Low, L. A. Cognitive and emotional control of pain  
382 and its disruption in chronic pain. *Nat Rev Neurosci* **14**, 502-511 (2013).
- 383 13. Moreira, F. A., Aguiar, D. C., Terzian, A. L., Guimaraes, F. S. & Wotjak, C. T.  
384 Cannabinoid type 1 receptors and transient receptor potential vanilloid type 1  
385 channels in fear and anxiety-two sides of one coin? *Neuroscience* **204**, 186-192  
386 (2012).
- 387 14. Turkheimer, F. E. et al. The methodology of TSPO imaging with positron  
388 emission tomography. *Biochem Soc Trans* **43**, 586-592 (2015).
- 389 15. Marinelli, S. et al. Botulinum neurotoxin type A counteracts neuropathic pain and  
390 facilitates functional recovery after peripheral nerve injury in animal models.  
391 *Neuroscience* **171**, 316-328 (2010).
- 392 16. Fujita, H. et al. Effects of GM-CSF and ordinary supplements on the ramification  
393 of microglia in culture: a morphometrical study. *Glia* **18**, 269-281 (1996).
- 394 17. Szabo, M. & Gulya, K. Development of the microglial phenotype in culture.  
395 *Neuroscience* **241**, 280-295 (2013).
- 396 18. Chiurchiù, V. et al. Proresolving lipid mediators resolvin D1, resolvin D2, and  
397 maresin 1 are critical in modulating T cell responses. *Sci Transl Med* **8**, 353ra111  
398 (2016).
- 399 19. Harris, J. A. et al. Anatomical characterization of Cre driver mice for neural  
400 circuit mapping and manipulation. *Front Neural Circuits* **8**, 76 (2014).

401 20. Ringkamp M, et al. Capsaicin responses in heat-sensitive and heat-insensitive A-  
402 fiber nociceptors. *J Neurosci.* **21**, 12 (2001).

403

404

405

406
